# Supplementary material for: Structure of supported DPPC/cholesterol bilayers studiedviaX-ray reflectivity
Source: Royal Society of Chemistry journal article supplement (doi:10.1039/d0cp01834a), 2020-01-01
Supplement: d0cp01834a2.xlsx [file d0cp01834a2.xlsx]

## Sheet: 0 mol%, 31°C
variable	value	error
acyl chain thickness (nm)	1.31399	0.0206745
outer acyl chain expansion (nm)	-0.0355741	0.0176544
head group electron density (electrons per nm cubed)	485.859	3.05421
acyl chain electron density (electrons per nm cubed)	323.702	3.03934
proximal leaflet interfacial roughness (nm)	0.260499	0.00521144
roughness expansion of distal leaflet (nm)	0.0571915	0.00688052
reduced chi-square	1.3158

## Sheet: 0 mol%, 36°C
variable	value	error
acyl chain thickness (nm)	1.31971	0.0213987
outer acyl chain expansion (nm)	-0.0370071	0.0181129
head group electron density (electrons per nm cubed)	483.86	3.10999
acyl chain electron density (electrons per nm cubed)	316.522	3.47566
proximal leaflet interfacial roughness (nm)	0.265146	0.00520259
roughness expansion of distal leaflet (nm)	0.0501026	0.00670611
reduced chi-square	1.2662

## Sheet: 0 mol%, 41°C
variable	value	error
acyl chain thickness (nm)	1.35157	0.0716781
outer acyl chain expansion (nm)	-0.142079	0.0162121
head group electron density (electrons per nm cubed)	485.599	2.99063
acyl chain electron density (electrons per nm cubed)	310.966	2.61809
proximal leaflet interfacial roughness (nm)	0.278927	0.00510638
roughness expansion of distal leaflet (nm)	0.0721528	0.00734863
reduced chi-square	0.9709

## Sheet: 0 mol%, 46°C
variable	value	error
acyl chain thickness (nm)	1.07845	0.144384
outer acyl chain expansion (nm)	-0.286678	0.0302485
head group electron density (electrons per nm cubed)	480.526	6.89042
acyl chain electron density (electrons per nm cubed)	269.45	4.06702
proximal leaflet interfacial roughness (nm)	0.363521	0.00873431
roughness expansion of distal leaflet (nm)	0.0209078	0.0151848
reduced chi-square	1.6163

## Sheet: 0 mol%, 51°C
variable	value	error
acyl chain thickness (nm)	0.994684	0.160103
outer acyl chain expansion (nm)	-0.319375	0.020223
head group electron density (electrons per nm cubed)	469.558	4.85982
acyl chain electron density (electrons per nm cubed)	261.596	3.03615
proximal leaflet interfacial roughness (nm)	0.352587	0.00634338
roughness expansion of distal leaflet (nm)	-0.0307227	0.011149
reduced chi-square	0.9011

## Sheet: 0 mol%, 56°C
variable	value	error
acyl chain thickness (nm)	0.977909	0.14419
outer acyl chain expansion (nm)	-0.286542	0.0291551
head group electron density (electrons per nm cubed)	462.74	6.40577
acyl chain electron density (electrons per nm cubed)	254.343	4.10897
proximal leaflet interfacial roughness (nm)	0.356629	0.00852731
roughness expansion of distal leaflet (nm)	-0.0271695	0.0138069
reduced chi-square	1.3947

## Sheet: 10 mol%, 31°C
variable	value	error
acyl chain thickness (nm)	1.42469	0.0326482
outer acyl chain expansion (nm)	-0.058841	0.0241473
head group electron density (electrons per nm cubed)	501.944	4.32195
acyl chain electron density (electrons per nm cubed)	296.658	3.73361
proximal leaflet interfacial roughness (nm)	0.299373	0.0066331
roughness expansion of distal leaflet (nm)	0.0831342	0.00914838
reduced chi-square	1.4907

## Sheet: 10 mol%, 36°C
variable	value	error
acyl chain thickness (nm)	1.40553	0.0570307
outer acyl chain expansion (nm)	-0.110068	0.0265372
head group electron density (electrons per nm cubed)	448.221	4.88585
acyl chain electron density (electrons per nm cubed)	277.832	4.25199
proximal leaflet interfacial roughness (nm)	0.262885	0.00759849
roughness expansion of distal leaflet (nm)	0.0734595	0.0113742
reduced chi-square	1.6579

## Sheet: 10 mol%, 41°C
variable	value	error
acyl chain thickness (nm)	1.29842	0.0609907
outer acyl chain expansion (nm)	-0.115603	0.035191
head group electron density (electrons per nm cubed)	457.694	6.70681
acyl chain electron density (electrons per nm cubed)	273.993	5.01678
proximal leaflet interfacial roughness (nm)	0.298542	0.00996198
roughness expansion of distal leaflet (nm)	0.0866174	0.0129567
reduced chi-square	1.6792

## Sheet: 10 mol%, 46°C
variable	value	error
acyl chain thickness (nm)	1.06543	0.0766379
outer acyl chain expansion (nm)	-0.149698	0.0294983
head group electron density (electrons per nm cubed)	461.65	5.0538
acyl chain electron density (electrons per nm cubed)	262.554	3.32764
proximal leaflet interfacial roughness (nm)	0.353607	0.00726866
roughness expansion of distal leaflet (nm)	0.0327589	0.010389
reduced chi-square	0.928

[truncated: 20 more sheets: 10 mol%, 51°C, 10 mol%, 56°C, 20 mol%, 31°C, 20 mol%, 36°C, 20 mol%, 41°C, 20 mol%, 46°C, 20 mol%, 51°C, 20 mol%, 56°C, 33 mol%, 31°C, 33 mol%, 36°C, 33 mol%, 41°C, 33 mol%, 46°C, 33 mol%, 51°C, 33 mol%, 56°C, 40 mol%, 31°C, 40 mol%, 36°C, 40 mol%, 41°C, 40 mol%, 46°C, 40 mol%, 51°C, 40 mol%, 56°C]
